# Supplementary material for: FCH domain only-2 organizes clathrin-coated structures and interacts with Disabled-2 for low-density lipoprotein receptor endocytosis
Source: PubMed Central journal article supplement — Mol Biol Cell. 2012 Apr 1;23(7):1330–42. doi: 10.1091/mbc.E11-09-0812 (PMC3315808; doi:10.1091/mbc.e11-09-0812), 2012-04-01
Supplement: supp_E11-09-0812_CombinedSupMats.pdf [file supp_E11-09-0812_CombinedSupMats.pdf]

Figure S1

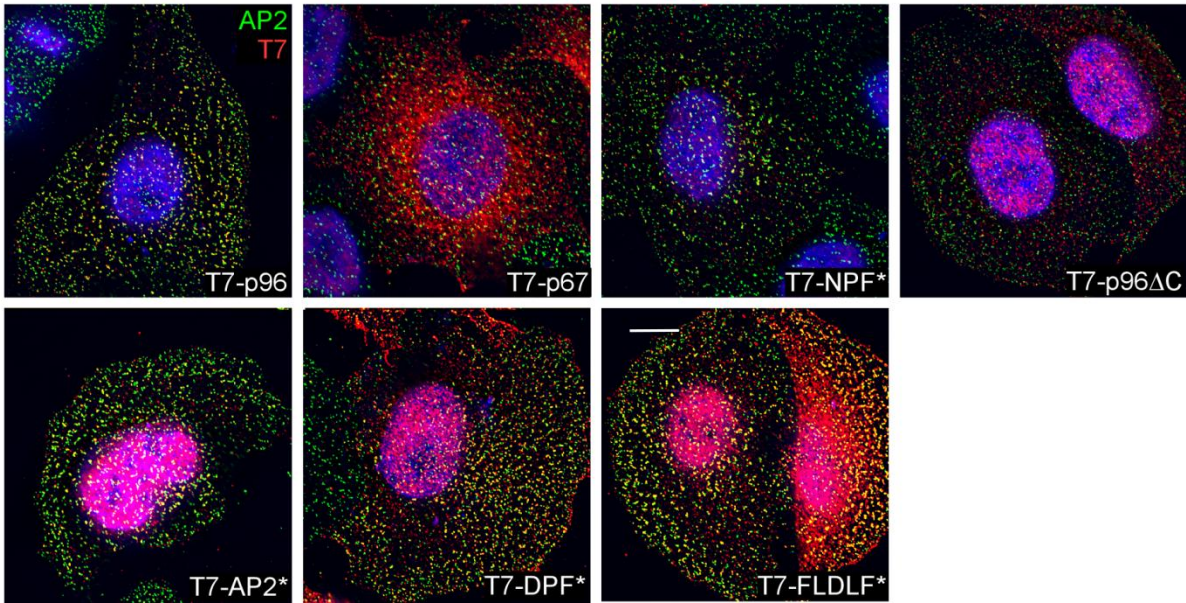

Figure S2

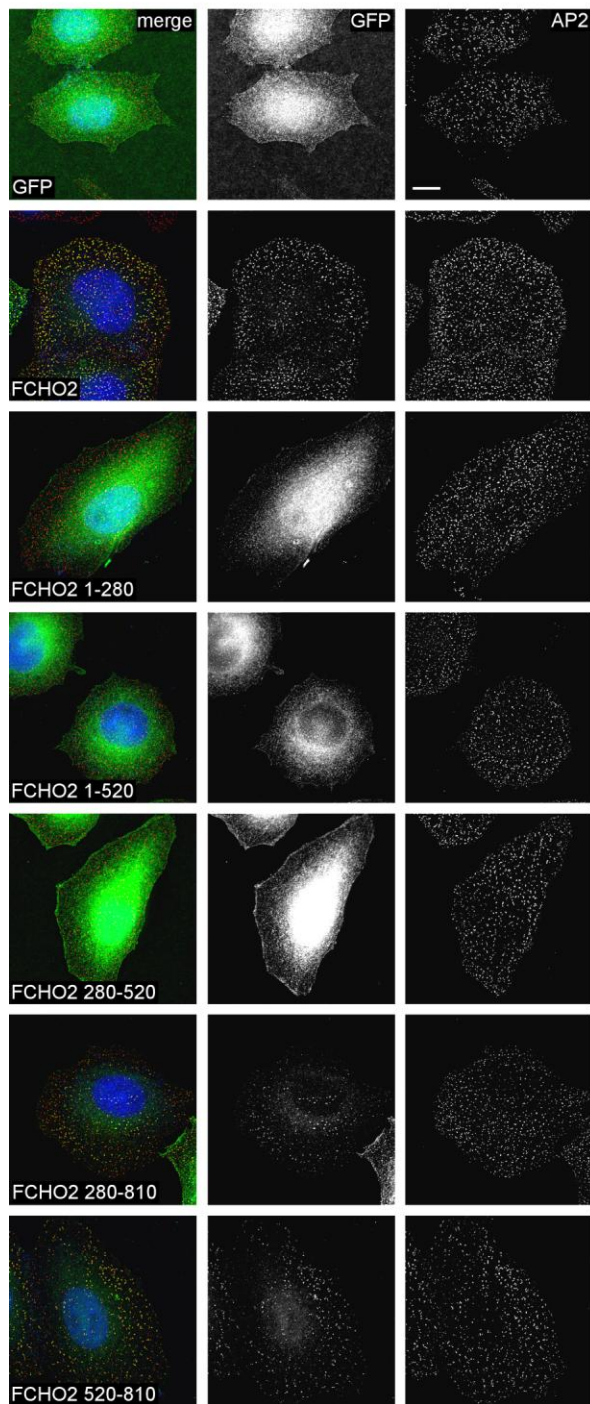

Figure S3

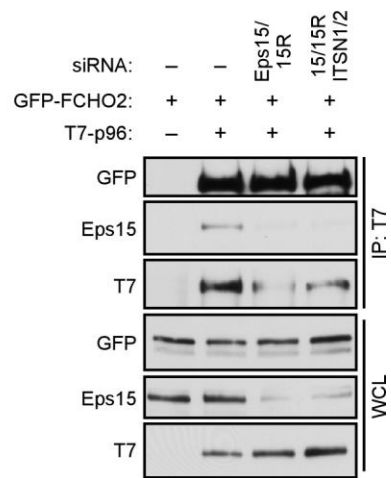

Figure S4

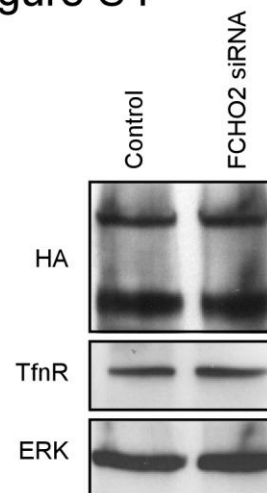

Figure S5

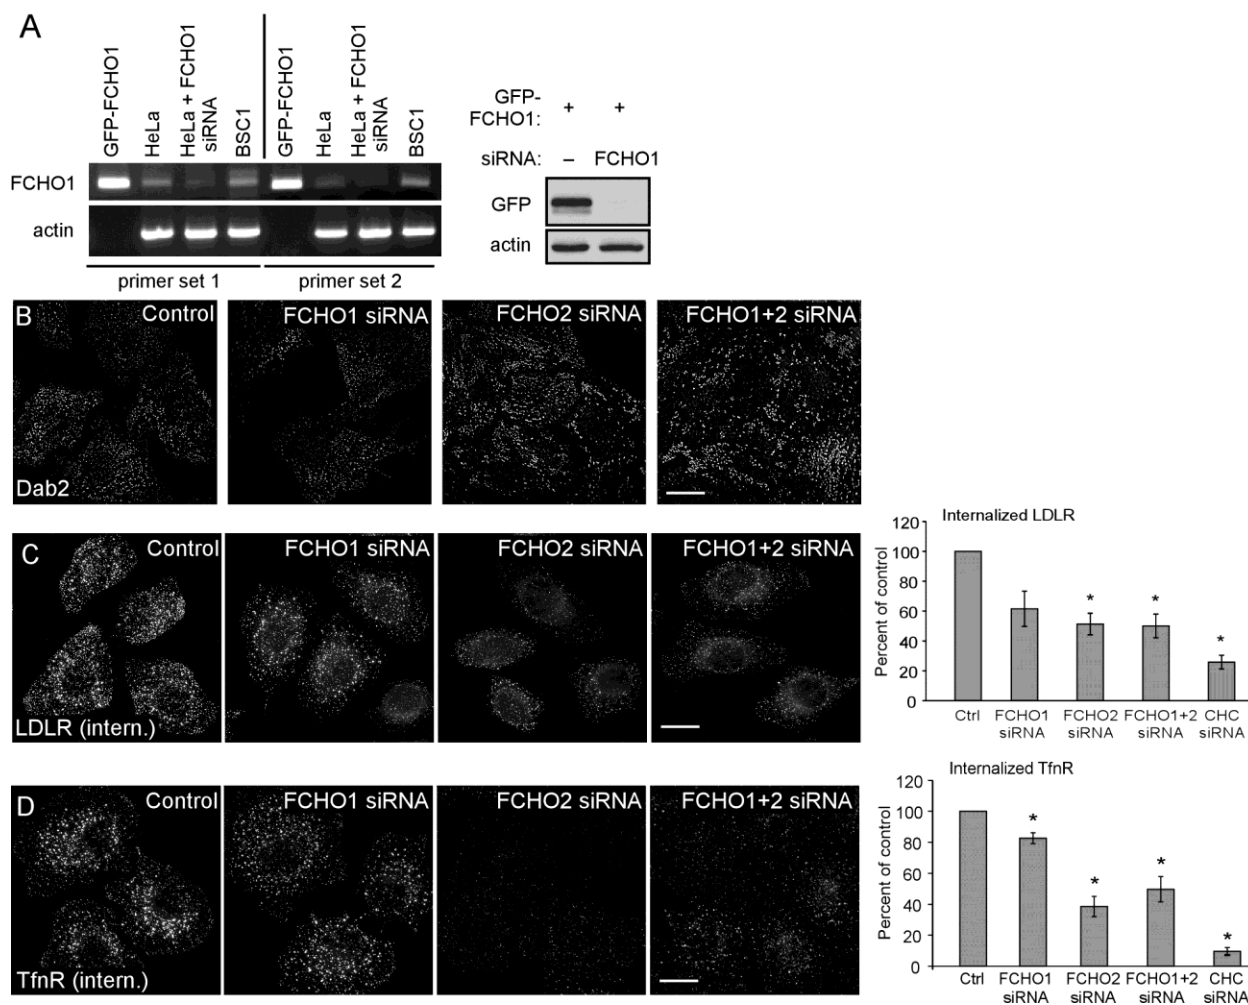

Figure S6

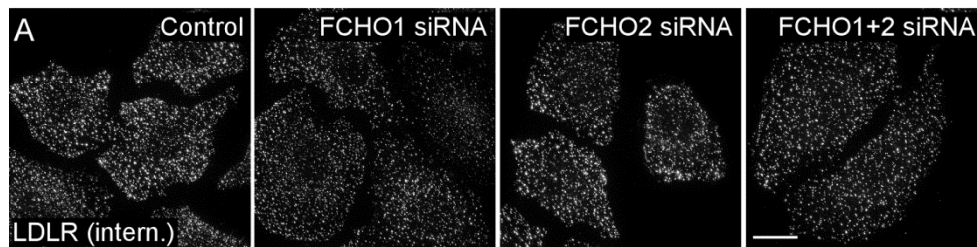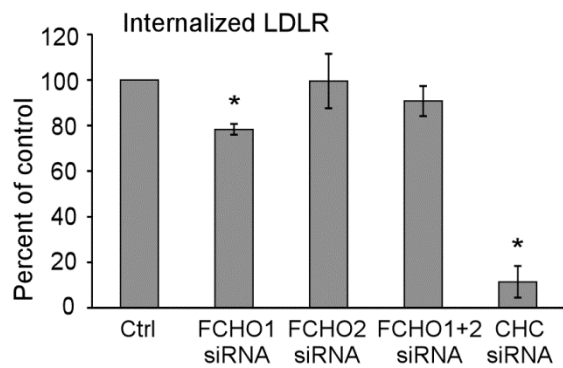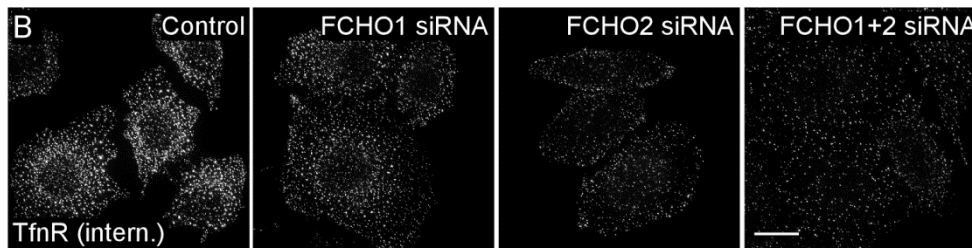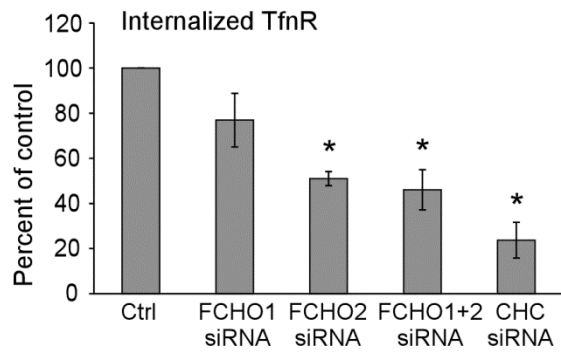

Figure S7

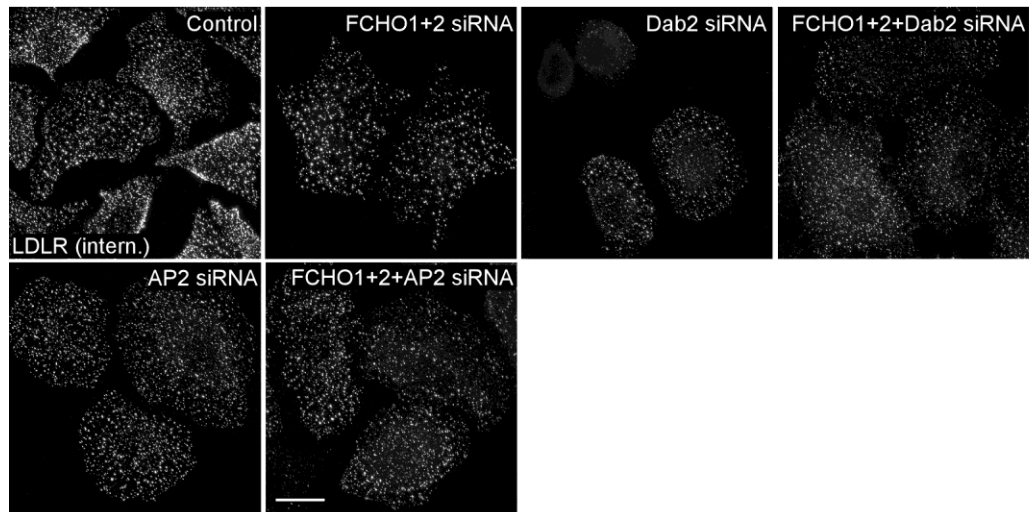

Figure S8

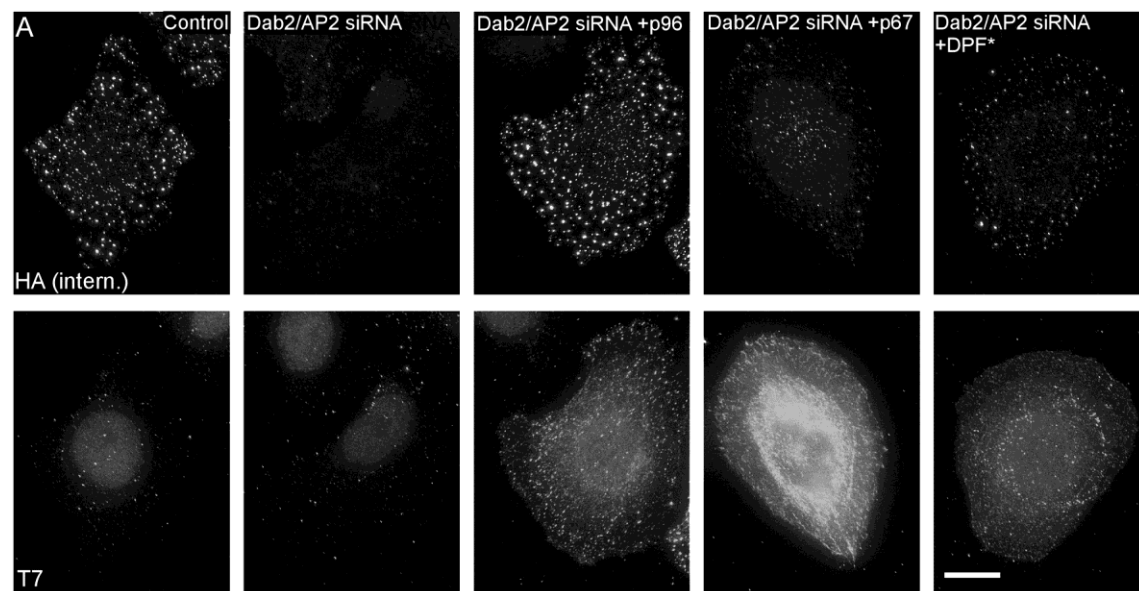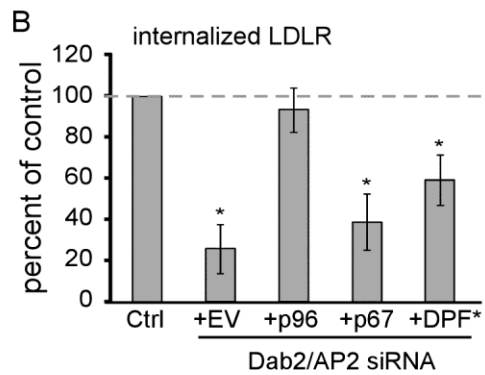

## Supplemental Figure Legends

### Figure S1

#### Localization of T7-Dab2 mutants

Fixed HeLa cells were permeabilized and stained with antibodies to T7 and  $\alpha$ -adaptin. The adherent surface of the cell is shown. Nuclear T7 staining is non-specific background. Scale bar is 10 $\mu$ m.

### Figure S2

#### The $\mu$ HD of FCHO2 is required to direct it to clathrin-coated pits

HeLa cells were transfected with GFP-tagged FCHO2 fragments, permeabilized, and stained for AP2. Shown is the adherent surface of the cell. Scale bar is 10 $\mu$ m.

### Figure S3

#### Depletion of EH domain proteins does not affect Dab2-FCHO2 binding

HeLa cells were transfected with two rounds of siRNA for Eps15/15R or Eps15/15R+ITSN1/2. Cells were also transiently transfected with DNA for T7-Dab2 and GFP-FCHO2. Cells were lysed and subjected to immunoprecipitation with antibodies to T7.

### Figure S4

#### FCHO2 depletion does not affect total cellular levels of TfnR or HA-miniLDLR.

HeLa cells transfected with siRNA to FCHO2 were lysed and immunoblotted for either TfnR or HA-miniLDLR. For HA-miniLDLR, the upper band corresponds to the unprocessed, ER form of the protein and the lower is the processed form (Li et al., 2001). ERK was used as a loading control.

### Figure S5

#### Effect of FCHO1+2 siRNA on LDLR and TfnR endocytosis at physiological conditions

(A) (Left) FCHO1 siRNA depletes both FCHO1 mRNA and GFP-FCHO1 protein. HeLa-miniLDLR cells were transfected with FCHO1 siRNA or buffer control on days 1 and 3 and lysed for RNA on day 5. Only low levels of FCHO1 were detected in HeLa cells. BSC1 cells were used as a positive control for FCHO1 expression (Henne *et al.*, 2010), and GFP-FCHO1 as a positive control for PCR. (Right) HeLa cells were transfected on days 1 and 3 with FCHO1 siRNA or buffer control and GFP-FCHO1 DNA on day 2, lysed, and subjected to Western blotting. (B) CCS size in cells transfected with siRNA for FCHO1, FCHO2, FCHO1+2, or buffer control. Cells were fixed and stained with anti-Dab2 antibody. Images are the adherent surface of a field of cells. Scale bar is 20  $\mu$ m. (C, D) Cells were transfected with FCHO1, FCHO2, FCHO1+2, or CHC siRNA or buffer control on days 1 and 3, and endocytosis was measured on day 5. Cells were given antibody against HA (C) or TfnR (D) and allowed to internalize for 2 min at 37°C. Values shown are means  $\pm$  standard error for at least three experiments. Images are z-stack projections of the entire cell height. Scale bars are 20  $\mu$ m. \*, P-value < 0.05 by Student's t-test. In neither case were FCHO2 and FCHO1+2 cells significantly different from one another.

### Figure S6

#### Effect of FCHO1+2 siRNA on LDLR and TfnR endocytosis with a 4°C pre-incubation

HeLa-miniLDLR cells were transfected with FCHO1, FCHO2, FCHO1+2, or CHC siRNA or buffer control on days 1 and 3, and endocytosis was measured on day 5. Cells were given antibody against HA (A) or TfnR (B) and incubated for 1 hr at 4°C. Cells were then placed in a 37°C waterbath and allowed to internalize for 2 min. Values shown are means +/- standard error for at least three experiments. Images are z-stack projections. Scale bars are 20 µm. \*, P-value < 0.05 by Student's t-test. In neither case were FCHO2 and FCHO1+2 cells significantly different from one another.

### **Figure S7**

#### **Additional depletion of Dab2 or AP2 with FCHO1+2 does not further decrease LDLR endocytosis with a 4°C pre-incubation**

HeLa-miniLDLR cells were transfected with combinations of FCHO1, FCHO2, Dab2, and AP2 siRNA or buffer control. Cells were given antibody against HA and incubated for 1 hr at 4°C. Cells were then placed in a 37°C waterbath and allowed to internalize for 2 min. Images are z-stack projections. Scale bar is 20 µm.

### **Figure S8**

#### **Dab2-DPF\* is deficient for LDLR endocytosis even when cells are given a 4°C pre-incubation.**

(A) HeLa-miniLDLR cells were transfected with siRNA to Dab2 and AP2 and DNA for T7-tagged Dab2 forms. Cells were incubated at 4°C for 1 hr with anti-HA, warmed to 37°C for 2 min, and then stained with antibodies to internalized HA and T7. Images are z-stack projections of the entire cell. Bar, 10µm. (B) Means and standard errors of fluorescence intensity of at least five cells from three separate experiments are shown. \*, P < 0.05 by Student's t-test compared to control cells. Dashed line indicates control level, EV: empty vector.
